# Supplementary material for: Serological Evidence of West Nile Virus in Wild Birds in Bangladesh
Source: Vet Sci. 2020 Oct 28;7(4):164. doi: 10.3390/vetsci7040164 (PMC7712446; doi:10.3390/vetsci7040164)
Supplement: Supplementary file 1 [file vetsci-07-00164-s001.xlsx]

## Sheet: MAP
Serial No.	Location	Total Sample (N)	Positive (%)	Species (+ve)	Positive (%)	Location	Northing (N)	Easting ( E)
1	Chittagong	58	15 (25.8)	Asian Pied Starling	9 (15.5)	Fulkoli, Bakolia	22.3479	91.8509
				Crow	6 (10.3)	Firingi Bazar	22.3299	91.8363
						Fulkoli, Bakolia	22.3479	91.8509
						Jhautola, Ctg	22.3594	91.8059
						Sher-Shah Mize Para	22.3836	91.8142
2	Sunamganj	3	3 (100)	Lesser whistling duck	2 (66.6)	Tanguar Hoar, Sunamganj	25.126	91.0978
				Tufted duck	1 (33.3)	Tanguar Hoar, Sunamganj	25.126	91.0978
3	Moulavibazar	44	4 (9.1)	Lesser whistling duck	3 (6.8)	Haor Khal, Hakaluki, Borolakha, Moulavibazar	24.6781	92.0477
				Tufted duck	1 (2.2)	Haor Khal, Hakaluki, Borolakha, Moulavibazar	24.6781	92.0477
4	Rajshahi	79	0 (0)	House Crow	0(0)	RMC,Rajshahi	24.371	88.5863
				Common Myna	0(0)
				Asian Pied Starling	0(0)
5	Sylhet div.	47	7 (14.8)	Lesser whistling duck	5 (10.6)	Haor Khal, Hakaluki, Borolakha, Moulavibazar	24.6781	92.0477
						Tanguar Hoar, Sunamganj	25.126	91.0978
				Tufted duck	2 (4.2)	Haor Khal, Hakaluki, Borolakha, Moulavibazar	24.6781	92.0477
						Tanguar Hoar, Sunamganj	25.126	91.0978

## Sheet: Sheet2
Serial No.	Id No.	Month	Species	Family	Native/Migratory	Landscape	Location	District	District_code	Northing (N)	Easting ( E)	Result	ELISA_Result_code	PCR_Result_code
1	1820	February	Tufted duck	Anatidae	Migratory wildbird	around lakes	Haor Khal, Hakaluki, Borolakha, Moulavibazar	Moulavibazar	3	24.6781	92.0477	Positive	1	0
2	1821	February	Lesser whistling duck	Anatidae	Migratory wildbird	around lakes	Haor Khal, Hakaluki, Borolakha, Moulavibazar	Moulavibazar	3	24.6781	92.0477	Positive	1	0
3	1823	February	Lesser whistling duck	Anatidae	Migratory wildbird	around lakes	Haor Khal, Hakaluki, Borolakha, Moulavibazar	Moulavibazar	3	24.6781	92.0477	Positive	1	0
4	2660	January	Asian Pied Starling	Sturnidae	Resident wildbird	plain	Fulkoli, Bakolia	Chittagong	1	22.3479	91.8509	Positive	1	0
5	2661	January	Crow	Corvidae	Resident wildbird	plain	Jhautola, Ctg	Chittagong	1	22.3594	91.8059	Negative	0	0
6	2662	January	Asian Pied Starling	Sturnidae	Resident wildbird	plain	Fulkoli, Bakolia	Chittagong	1	22.3479	91.8509	Positive	1	0
7	2663	January	Crow	Corvidae	Resident wildbird	plain	Jhautola, Ctg	Chittagong	1	22.3594	91.8059	Negative	0	0
8	2666	January	Asian Pied Starling	Sturnidae	Resident wildbird	plain	Fulkoli, Bakolia	Chittagong	1	22.3479	91.8509	Negative	0	0
9	2666	January	Crow	Corvidae	Resident wildbird	plain	Jhautola, Ctg	Chittagong	1	22.3594	91.8059	Negative	0	0
10	2673	January	Crow	Corvidae	Resident wildbird	plain	Jhautola, Ctg	Chittagong	1	22.3594	91.8059	Positive	1	0
11	2675	January	Crow	Corvidae	Resident wildbird	plain	Jhautola, Ctg	Chittagong	1	22.3594	91.8059	Negative	0	0
12	2677	January	Asian Pied Starling	Sturnidae	Resident wildbird	plain	Fulkoli, Bakolia	Chittagong	1	22.3479	91.8509	Positive	1	0
13	2679	January	Asian Pied Starling	Sturnidae	Resident wildbird	plain	Fulkoli, Bakolia	Chittagong	1	22.3479	91.8509	Positive	1	0
14	2688	January	Asian Pied Starling	Sturnidae	Resident wildbird	plain	Fulkoli, Bakolia	Chittagong	1	22.3479	91.8509	Positive	1	0
15	2691	January	Crow	Corvidae	Resident wildbird	plain	Jhautola, Ctg	Chittagong	1	22.3594	91.8059	Positive	1	0
16	2697	January	Crow	Corvidae	Resident wildbird	plain	Jhautola, Ctg	Chittagong	1	22.3594	91.8059	Negative	0	0
17	2718	January	Asian Pied Starling	Sturnidae	Resident wildbird	plain	Fulkoli, Bakolia	Chittagong	1	22.3479	91.8509	Positive	1	0
18	2720	January	Asian Pied Starling	Sturnidae	Resident wildbird	plain	Fulkoli, Bakolia	Chittagong	1	22.3479	91.8509	Negative	0	0
19	2721	January	Asian Pied Starling	Sturnidae	Resident wildbird	plain	Fulkoli, Bakolia	Chittagong	1	22.3479	91.8509	Negative	0	0
20	2722	January	Asian Pied Starling	Sturnidae	Resident wildbird	plain	Fulkoli, Bakolia	Chittagong	1	22.3479	91.8509	Negative	0	0
21	2725	January	Asian Pied Starling	Sturnidae	Resident wildbird	plain	Fulkoli, Bakolia	Chittagong	1	22.3479	91.8509	Negative	0	0
22	2726	January	Asian Pied Starling	Sturnidae	Resident wildbird	plain	Fulkoli, Bakolia	Chittagong	1	22.3479	91.8509	Negative	0	0
23	2727	January	Asian Pied Starling	Sturnidae	Resident wildbird	plain	Fulkoli, Bakolia	Chittagong	1	22.3479	91.8509	Negative	0	0
24	2728	January	Asian Pied Starling	Sturnidae	Resident wildbird	plain	Fulkoli, Bakolia	Chittagong	1	22.3479	91.8509	Negative	0	0
25	2729	January	Asian Pied Starling	Sturnidae	Resident wildbird	plain	Fulkoli, Bakolia	Chittagong	1	22.3479	91.8509	Negative	0	0
26	2730	January	Asian Pied Starling	Sturnidae	Resident wildbird	plain	Fulkoli, Bakolia	Chittagong	1	22.3479	91.8509	Negative	0	0
27	2736	January	Crow	Corvidae	Resident wildbird	plain	Fulkoli, Bakolia	Chittagong	1	22.3479	91.8509	Negative	0	0
28	2738	January	Asian Pied Starling	Sturnidae	Resident wildbird	plain	Fulkoli, Bakolia	Chittagong	1	22.3479	91.8509	Negative	0	0
29	2789	January	Asian Pied Starling	Sturnidae	Resident wildbird	plain	Fulkoli, Bakolia	Chittagong	1	22.3479	91.8509	Negative	0	0
30	2790	January	Crow	Corvidae	Resident wildbird	plain	Fulkoli, Bakolia	Chittagong	1	22.3479	91.8509	Negative	0	0
31	2791	January	Crow	Corvidae	Resident wildbird	plain	Fulkoli, Bakolia	Chittagong	1	22.3479	91.8509	Negative	0	0
32	2792	January	Crow	Corvidae	Resident wildbird	plain	Fulkoli, Bakolia	Chittagong	1	22.3479	91.8509	Negative	0	0
33	2800	January	Asian Pied Starling	Sturnidae	Resident wildbird	plain	Fulkoli, Bakolia	Chittagong	1	22.3479	91.8509	Negative	0	0
34	2801	January	Asian Pied Starling	Sturnidae	Resident wildbird	plain	Fulkoli, Bakolia	Chittagong	1	22.3479	91.8509	Negative	0	0
35	2802	January	Asian Pied Starling	Sturnidae	Resident wildbird	plain	Fulkoli, Bakolia	Chittagong	1	22.3479	91.8509	Negative	0	0
36	2803	January	Asian Pied Starling	Sturnidae	Resident wildbird	plain	Fulkoli, Bakolia	Chittagong	1	22.3479	91.8509	Negative	0	0
37	2804	January	Asian Pied Starling	Sturnidae	Resident wildbird	plain	Fulkoli, Bakolia	Chittagong	1	22.3479	91.8509	Negative	0	0
38	2805	January	Crow	Corvidae	Resident wildbird	plain	Fulkoli, Bakolia	Chittagong	1	22.3479	91.8509	Negative	0	0
39	2808	January	Crow	Corvidae	Resident wildbird	plain	Fulkoli, Bakolia	Chittagong	1	22.3479	91.8509	Positive	1	0
40	2809	January	Asian Pied Starling	Sturnidae	Resident wildbird	plain	Fulkoli, Bakolia	Chittagong	1	22.3479	91.8509	Negative	0	0
41	2810	January	Asian Pied Starling	Sturnidae	Resident wildbird	plain	Fulkoli, Bakolia	Chittagong	1	22.3479	91.8509	Negative	0	0
42	2811	January	Asian Pied Starling	Sturnidae	Resident wildbird	plain	Fulkoli, Bakolia	Chittagong	1	22.3479	91.8509	Negative	0	0
43	2812	January	Asian Pied Starling	Sturnidae	Resident wildbird	plain	Fulkoli, Bakolia	Chittagong	1	22.3479	91.8509	Positive	1	0
44	2813	January	Asian Pied Starling	Sturnidae	Resident wildbird	plain	Fulkoli, Bakolia	Chittagong	1	22.3479	91.8509	Negative	0	0
45	2814	January	Asian Pied Starling	Sturnidae	Resident wildbird	plain	Fulkoli, Bakolia	Chittagong	1	22.3479	91.8509	Negative	0	0
46	2815	January	Asian Pied Starling	Sturnidae	Resident wildbird	plain	Fulkoli, Bakolia	Chittagong	1	22.3479	91.8509	Positive	1	0
47	2816	January	Asian Pied Starling	Sturnidae	Resident wildbird	plain	Fulkoli, Bakolia	Chittagong	1	22.3479	91.8509	Positive	1	0
48	2817	January	Asian Pied Starling	Sturnidae	Resident wildbird	plain	Fulkoli, Bakolia	Chittagong	1	22.3479	91.8509	Negative	0	0
49	2818	January	Asian Pied Starling	Sturnidae	Resident wildbird	plain	Fulkoli, Bakolia	Chittagong	1	22.3479	91.8509	Negative	0	0
50	2824	January	Crow	Corvidae	Resident wildbird	plain	Firingi Bazar	Chittagong	1	22.3299	91.8363	Negative	0	0
51	2825	January	Crow	Corvidae	Resident wildbird	plain	Firingi Bazar	Chittagong	1	22.3299	91.8363	Negative	0	0
52	2826	January	Crow	Corvidae	Resident wildbird	plain	Firingi Bazar	Chittagong	1	22.3299	91.8363	Negative	0	0
53	2827	January	Crow	Corvidae	Resident wildbird	plain	Firingi Bazar	Chittagong	1	22.3299	91.8363	Positive	1	0
54	2828	January	Asian Pied Starling	Sturnidae	Resident wildbird	plain	Fulkoli, Bakolia	Chittagong	1	22.3479	91.8509	Negative	0	0
55	2829	January	Crow	Corvidae	Resident wildbird	plain	Firingi Bazar	Chittagong	1	22.3299	91.8363	Negative	0	0
56	2830	January	Crow	Corvidae	Resident wildbird	plain	Firingi Bazar	Chittagong	1	22.3299	91.8363	Positive	1	0
57	2831	January	Asian Pied Starling	Sturnidae	Resident wildbird	plain	Sher-Shah Mize Para	Chittagong	1	22.3836	91.8142	Negative	0	0
58	2832	January	Crow	Corvidae	Resident wildbird	plain	Sher-Shah Mize Para	Chittagong	1	22.3836	91.8142	Negative	0	0
59	2833	January	Crow	Corvidae	Resident wildbird	plain	Sher-Shah Mize Para	Chittagong	1	22.3836	91.8142	Positive	1	0
60	2834	January	Crow	Corvidae	Resident wildbird	plain	Sher-Shah Mize Para	Chittagong	1	22.3836	91.8142	Negative	0	0
61	2835	January	Asian Pied Starling	Sturnidae	Resident wildbird	plain	Sher-Shah Mize Para	Chittagong	1	22.3836	91.8142	Negative	0	0
62	2906	February	Northern Pintail	Anatidae	Migratory wildbird	around lakes	Haor Khal, Hakaluki, Borolakha, Moulavibazar	Moulavibazar	3	24.6781	92.0477	Negative	0	0
63	2908	February	Lesser whistling duck	Anatidae	Migratory wildbird	around lakes	Haor Khal, Hakaluki, Borolakha, Moulavibazar	Moulavibazar	3	24.6781	92.0477	Negative	0	0
64	2911	February	Lesser whistling duck	Anatidae	Migratory wildbird	around lakes	Haor Khal, Hakaluki, Borolakha, Moulavibazar	Moulavibazar	3	24.6781	92.0477	Negative	0	0
65	2912	February	Lesser whistling duck	Anatidae	Migratory wildbird	around lakes	Haor Khal, Hakaluki, Borolakha, Moulavibazar	Moulavibazar	3	24.6781	92.0477	Negative	0	0
66	2913	February	Sea Gull (Gung Chill)	Laridae	Resident wildbird	around lakes	Haor Khal, Hakaluki, Borolakha, Moulavibazar	Moulavibazar	3	24.6781	92.0477	Negative	0	0
67	2917	February	Lesser whistling duck	Anatidae	Migratory wildbird	around lakes	Haor Khal, Hakaluki, Borolakha, Moulavibazar	Moulavibazar	3	24.6781	92.0477	Negative	0	0
68	3406	February	Northern Pintail	Anatidae	Migratory wildbird	around lakes	Haor Khal, Hakaluki, Borolakha, Moulavibazar	Moulavibazar	3	24.6781	92.0477	Negative	0	0
69	3409	February	Sea Gull (Gung Chill)	Laridae	Resident wildbird	around lakes	Haor Khal, Hakaluki, Borolakha, Moulavibazar	Moulavibazar	3	24.6781	92.0477	Negative	0	0
70	3411	February	Sea Gull (Gung Chill)	Laridae	Resident wildbird	around lakes	Haor Khal, Hakaluki, Borolakha, Moulavibazar	Moulavibazar	3	24.6781	92.0477	Negative	0	0
71	3412	February	Northern Pintail	Anatidae	Migratory wildbird	around lakes	Haor Khal, Hakaluki, Borolakha, Moulavibazar	Moulavibazar	3	24.6781	92.0477	Negative	0	0
72	3413	February	Lesser whistling duck	Anatidae	Migratory wildbird	around lakes	Haor Khal, Hakaluki, Borolakha, Moulavibazar	Moulavibazar	3	24.6781	92.0477	Positive	1	0
73	3416	February	Northern Pintail	Anatidae	Migratory wildbird	around lakes	Haor Khal, Hakaluki, Borolakha, Moulavibazar	Moulavibazar	3	24.6781	92.0477	Negative	0	0
74	3419	February	Northern Pintail	Anatidae	Migratory wildbird	around lakes	Haor Khal, Hakaluki, Borolakha, Moulavibazar	Moulavibazar	3	24.6781	92.0477	Negative	0	0
75	3420	February	Northern Pintail	Anatidae	Migratory wildbird	around lakes	Haor Khal, Hakaluki, Borolakha, Moulavibazar	Moulavibazar	3	24.6781	92.0477	Negative	0	0
76	3430	February	Common Morhen	Rallidae	Migratory wildbird	around lakes	Poalar Bill, Hakaluki	Moulavibazar	3	24.6862	92.0553	Negative	0	0
77	3433	February	Common Morhen	Rallidae	Migratory wildbird	around lakes	Poalar Bill, Hakaluki	Moulavibazar	3	24.6862	92.0553	Negative	0	0
78	3435	February	Common Morhen	Rallidae	Migratory wildbird	around lakes	Poalar Bill, Hakaluki	Moulavibazar	3	24.6862	92.0553	Negative	0	0
79	3438	February	Lesser whistling duck	Anatidae	Migratory wildbird	around lakes	Haor Khal, Hakaluki, Borolakha, Moulavibazar	Moulavibazar	3	24.6781	92.0477	Negative	0	0
80	3443	February	Lesser whistling duck	Anatidae	Migratory wildbird	around lakes	Haor Khal, Hakaluki, Borolakha, Moulavibazar	Moulavibazar	3	24.6781	92.0477	Negative	0	0
81	3444	February	Lesser whistling duck	Anatidae	Migratory wildbird	around lakes	Haor Khal, Hakaluki, Borolakha, Moulavibazar	Moulavibazar	3	24.6781	92.0477	Negative	0	0
82	3446	February	Northern Pintail	Anatidae	Migratory wildbird	around lakes	Haor Khal, Hakaluki, Borolakha, Moulavibazar	Moulavibazar	3	24.6781	92.0477	Negative	0	0
83	3447	February	Lesser whistling duck	Anatidae	Migratory wildbird	around lakes	Haor Khal, Hakaluki, Borolakha, Moulavibazar	Moulavibazar	3	24.6781	92.0477	Negative	0	0
84	3451	February	Lesser whistling duck	Anatidae	Migratory wildbird	around lakes	Haor Khal, Hakaluki, Borolakha, Moulavibazar	Moulavibazar	3	24.6781	92.0477	Negative	0	0
85	3452	February	Northern Pintail	Anatidae	Migratory wildbird	around lakes	Haor Khal, Hakaluki, Borolakha, Moulavibazar	Moulavibazar	3	24.6781	92.0477	Negative	0	0
86	3454	February	Lesser whistling duck	Anatidae	Migratory wildbird	around lakes	Haor Khal, Hakaluki, Borolakha, Moulavibazar	Moulavibazar	3	24.6781	92.0477	Negative	0	0
87	3455	February	Tufted duck	Anatidae	Migratory wildbird	around lakes	Haor Khal, Hakaluki, Borolakha, Moulavibazar	Moulavibazar	3	24.6781	92.0477	Negative	0	0
88	3456	February	Tufted duck	Anatidae	Migratory wildbird	around lakes	Haor Khal, Hakaluki, Borolakha, Moulavibazar	Moulavibazar	3	24.6781	92.0477	Negative	0	0
89	3457	February	Lesser whistling duck	Anatidae	Migratory wildbird	around lakes	Haor Khal, Hakaluki, Borolakha, Moulavibazar	Moulavibazar	3	24.6781	92.0477	Negative	0	0
90	3458	February	Tufted duck	Anatidae	Migratory wildbird	around lakes	Haor Khal, Hakaluki, Borolakha, Moulavibazar	Moulavibazar	3	24.6781	92.0477	Negative	0	0
91	3462	February	Tufted duck	Anatidae	Migratory wildbird	around lakes	Haor Khal, Hakaluki, Borolakha, Moulavibazar	Moulavibazar	3	24.6781	92.0477	Negative	0	0
92	3466	February	Lesser whistling duck	Anatidae	Migratory wildbird	around lakes	Haor Khal, Hakaluki, Borolakha, Moulavibazar	Moulavibazar	3	24.6781	92.0477	Negative	0	0
93	3554	February	Northern Pintail	Anatidae	Migratory wildbird	around lakes	Haor Khal, Hakaluki, Borolakha, Moulavibazar	Moulavibazar	3	24.6781	92.0477	Negative	0	0
94	3562	February	Lesser whistling duck	Anatidae	Migratory wildbird	around lakes	Haor Khal, Hakaluki, Borolakha, Moulavibazar	Moulavibazar	3	24.6781	92.0477	Positive	1	0
95	3563	February	Tufted duck	Anatidae	Migratory wildbird	around lakes	Haor Khal, Hakaluki, Borolakha, Moulavibazar	Moulavibazar	3	24.6781	92.0477	Positive	1	0
96	3571	February	Lesser whistling duck	Anatidae	Migratory wildbird	around lakes	Haor Khal, Hakaluki, Borolakha, Moulavibazar	Moulavibazar	3	24.6781	92.0477	Negative	0	0
97	3579	February	Northern Pintail	Anatidae	Migratory wildbird	around lakes	Haor Khal, Hakaluki, Borolakha, Moulavibazar	Moulavibazar	3	24.6781	92.0477	Negative	0	0
98	3583	February	Lesser whistling duck	Anatidae	Migratory wildbird	around lakes	Haor Khal, Hakaluki, Borolakha, Moulavibazar	Moulavibazar	3	24.6781	92.0477	Positive	1	0
99	3587	February	Tufted duck	Anatidae	Migratory wildbird	around lakes	Haor Khal, Hakaluki, Borolakha, Moulavibazar	Moulavibazar	3	24.6781	92.0477	Negative	0	0
100	3589	February	Northern Pintail	Anatidae	Migratory wildbird	around lakes	Haor Khal, Hakaluki, Borolakha, Moulavibazar	Moulavibazar	3	24.6781	92.0477	Negative	0	0
101	3598	February	Lesser whistling duck	Anatidae	Migratory wildbird	around lakes	Haor Khal, Hakaluki, Borolakha, Moulavibazar	Moulavibazar	3	24.6781	92.0477	Negative	0	0
102	3601	February	Northern Pintail	Anatidae	Migratory wildbird	around lakes	Haor Khal, Hakaluki, Borolakha, Moulavibazar	Moulavibazar	3	24.6781	92.0477	Negative	0	0
103	3604	February	Lesser whistling duck	Anatidae	Migratory wildbird	around lakes	Haor Khal, Hakaluki, Borolakha, Moulavibazar	Moulavibazar	3	24.6781	92.0477	Negative	0	0
104	3629	February	Lesser whistling duck	Anatidae	Migratory wildbird	around lakes	Haor Khal, Hakaluki, Borolakha, Moulavibazar	Moulavibazar	3	24.6781	92.0477	Negative	0	0
105	3630	February	Lesser whistling duck	Anatidae	Migratory wildbird	around lakes	Haor Khal, Hakaluki, Borolakha, Moulavibazar	Moulavibazar	3	24.6781	92.0477	Negative	0	0
106	RI-105	February	Crow	Corvidae	Resident wildbird	plain	Padmarpar, Rajshahi	Rajshahi	2	24.3618	88.599	Negative	0	0
107	RI-106	February	Crow	Corvidae	Resident wildbird	plain	RMC,Rajshahi	Rajshahi	2	24.371	88.5863	Negative	0	0
108	RI-107	February	Crow	Corvidae	Resident wildbird	plain	RMC,Rajshahi	Rajshahi	2	24.371	88.5863	Negative	0	0
109	RI-111	February	Asian Pied Starling	Sturnidae	Resident wildbird	plain	RMC,Rajshahi	Rajshahi	2	24.371	88.5863	Negative	0	0
110	RI-112	February	Asian Pied Starling	Sturnidae	Resident wildbird	plain	RMC,Rajshahi	Rajshahi	2	24.371	88.5863	Negative	0	0
111	RI-113	February	Asian Pied Starling	Sturnidae	Resident wildbird	plain	RMC,Rajshahi	Rajshahi	2	24.371	88.5863	Negative	0	0
112	RI-114	February	Asian Pied Starling	Sturnidae	Resident wildbird	plain	RMC,Rajshahi	Rajshahi	2	24.371	88.5863	Negative	0	0
113	RI-115	February	Asian Pied Starling	Sturnidae	Resident wildbird	plain	RMC,Rajshahi	Rajshahi	2	24.371	88.5863	Negative	0	0
114	RI-116	February	Asian Pied Starling	Sturnidae	Resident wildbird	plain	RMC,Rajshahi	Rajshahi	2	24.371	88.5863	Negative	0	0
115	RI-117	February	Asian Pied Starling	Sturnidae	Resident wildbird	plain	RMC,Rajshahi	Rajshahi	2	24.371	88.5863	Negative	0	0
116	RI-118	February	House sparrow	Passeridae	Resident wildbird	plain	RMC,Rajshahi	Rajshahi	2	24.371	88.5863	Negative	0	0
117	RI-119	February	White Throated Kingfisher	Alcedinidae	Resident wildbird	plain	RMC,Rajshahi	Rajshahi	2	24.371	88.5863	Negative	0	0
118	RI-120	February	Crow	Corvidae	Resident wildbird	plain	RMC,Rajshahi	Rajshahi	2	24.371	88.5863	Negative	0	0
119	RI-121	February	Crow	Corvidae	Resident wildbird	plain	RMC,Rajshahi	Rajshahi	2	24.371	88.5863	Negative	0	0
120	RI-122	February	Crow	Corvidae	Resident wildbird	plain	RMC,Rajshahi	Rajshahi	2	24.371	88.5863	Negative	0	0
121	RI-123	February	Crow	Corvidae	Resident wildbird	plain	RMC,Rajshahi	Rajshahi	2	24.371	88.5863	Negative	0	0
122	RI-124	February	Crow	Corvidae	Resident wildbird	plain	RMC,Rajshahi	Rajshahi	2	24.371	88.5863	Negative	0	0
123	RI-125	February	Common myna	Sturnidae	Resident wildbird	plain	RMC,Rajshahi	Rajshahi	2	24.371	88.5863	Negative	0	0
124	RI-126	February	Common myna	Sturnidae	Resident wildbird	plain	RMC,Rajshahi	Rajshahi	2	24.371	88.5863	Negative	0	0
125	RI-127	February	Common myna	Sturnidae	Resident wildbird	plain	RMC,Rajshahi	Rajshahi	2	24.371	88.5863	Negative	0	0
126	RI-128	February	Common myna	Sturnidae	Resident wildbird	plain	RMC,Rajshahi	Rajshahi	2	24.371	88.5863	Negative	0	0
127	RI-129	February	Common myna	Sturnidae	Resident wildbird	plain	RMC,Rajshahi	Rajshahi	2	24.371	88.5863	Negative	0	0
128	RI-130	February	Common myna	Sturnidae	Resident wildbird	plain	RMC,Rajshahi	Rajshahi	2	24.371	88.5863	Negative	0	0
129	RI-131	February	Common myna	Sturnidae	Resident wildbird	plain	RMC,Rajshahi	Rajshahi	2	24.371	88.5863	Negative	0	0
130	RI-132	February	Common myna	Sturnidae	Resident wildbird	plain	RMC,Rajshahi	Rajshahi	2	24.371	88.5863	Negative	0	0
131	RI-133	February	Common myna	Sturnidae	Resident wildbird	plain	RMC,Rajshahi	Rajshahi	2	24.371	88.5863	Negative	0	0
132	RI-134	February	Common myna	Sturnidae	Resident wildbird	plain	RMC,Rajshahi	Rajshahi	2	24.371	88.5863	Negative	0	0
133	RI-135	February	Common myna	Sturnidae	Resident wildbird	plain	RMC,Rajshahi	Rajshahi	2	24.371	88.5863	Negative	0	0
134	RI-136	February	Common myna	Sturnidae	Resident wildbird	plain	RMC,Rajshahi	Rajshahi	2	24.371	88.5863	Negative	0	0
135	RI-137	February	Common myna	Sturnidae	Resident wildbird	plain	RMC,Rajshahi	Rajshahi	2	24.371	88.5863	Negative	0	0
136	RI-138	February	Common myna	Sturnidae	Resident wildbird	plain	RMC,Rajshahi	Rajshahi	2	24.371	88.5863	Negative	0	0
137	RI-139	February	Common myna	Sturnidae	Resident wildbird	plain	RMC,Rajshahi	Rajshahi	2	24.371	88.5863	Negative	0	0
138	RI-140	February	Common myna	Sturnidae	Resident wildbird	plain	RMC,Rajshahi	Rajshahi	2	24.371	88.5863	Negative	0	0
139	RI-141	February	Common myna	Sturnidae	Resident wildbird	plain	RMC,Rajshahi	Rajshahi	2	24.371	88.5863	Negative	0	0
140	RI-142	February	Common myna	Sturnidae	Resident wildbird	plain	RMC,Rajshahi	Rajshahi	2	24.371	88.5863	Negative	0	0
141	RI-143	February	Common myna	Sturnidae	Resident wildbird	plain	RMC,Rajshahi	Rajshahi	2	24.371	88.5863	Negative	0	0
142	RI-144	February	Common myna	Sturnidae	Resident wildbird	plain	RMC,Rajshahi	Rajshahi	2	24.371	88.5863	Negative	0	0
143	RI-145	February	Common myna	Sturnidae	Resident wildbird	plain	RMC,Rajshahi	Rajshahi	2	24.371	88.5863	Negative	0	0
144	RI-146	February	Common myna	Sturnidae	Resident wildbird	plain	RMC,Rajshahi	Rajshahi	2	24.371	88.5863	Negative	0	0
145	RI-147	February	Common myna	Sturnidae	Resident wildbird	plain	RMC,Rajshahi	Rajshahi	2	24.371	88.5863	Negative	0	0
146	RI-148	February	Common myna	Sturnidae	Resident wildbird	plain	RMC,Rajshahi	Rajshahi	2	24.371	88.5863	Negative	0	0
147	RI-149	February	Common myna	Sturnidae	Resident wildbird	plain	RMC,Rajshahi	Rajshahi	2	24.371	88.5863	Negative	0	0
148	RI-150	February	Common myna	Sturnidae	Resident wildbird	plain	RMC,Rajshahi	Rajshahi	2	24.371	88.5863	Negative	0	0
149	RI-151	February	Common myna	Sturnidae	Resident wildbird	plain	RMC,Rajshahi	Rajshahi	2	24.371	88.5863	Negative	0	0
150	RI-152	February	Common myna	Sturnidae	Resident wildbird	plain	RMC,Rajshahi	Rajshahi	2	24.371	88.5863	Negative	0	0
151	RI-153	February	Common myna	Sturnidae	Resident wildbird	plain	RMC,Rajshahi	Rajshahi	2	24.371	88.5863	Negative	0	0
152	RI-154	February	Common myna	Sturnidae	Resident wildbird	plain	RMC,Rajshahi	Rajshahi	2	24.371	88.5863	Negative	0	0
153	RI-155	February	Common myna	Sturnidae	Resident wildbird	plain	RMC,Rajshahi	Rajshahi	2	24.371	88.5863	Negative	0	0
154	RI-156	February	White Throated Kingfisher	Alcedinidae	Resident wildbird	plain	RMC,Rajshahi	Rajshahi	2	24.371	88.5863	Negative	0	0
155	RI-157	February	Common myna	Sturnidae	Resident wildbird	plain	RMC,Rajshahi	Rajshahi	2	24.371	88.5863	Negative	0	0
156	RI-158	February	Common myna	Sturnidae	Resident wildbird	plain	RMC,Rajshahi	Rajshahi	2	24.371	88.5863	Negative	0	0
157	RI-159	February	Common myna	Sturnidae	Resident wildbird	plain	RMC,Rajshahi	Rajshahi	2	24.371	88.5863	Negative	0	0
158	RI-160	February	Common myna	Sturnidae	Resident wildbird	plain	RMC,Rajshahi	Rajshahi	2	24.371	88.5863	Negative	0	0
159	RI-161	February	Common myna	Sturnidae	Resident wildbird	plain	RMC,Rajshahi	Rajshahi	2	24.371	88.5863	Negative	0	0
160	RI-162	February	Common myna	Sturnidae	Resident wildbird	plain	RMC,Rajshahi	Rajshahi	2	24.371	88.5863	Negative	0	0
161	RI-163	February	Common myna	Sturnidae	Resident wildbird	plain	RMC,Rajshahi	Rajshahi	2	24.371	88.5863	Negative	0	0
162	RI-164	February	Common myna	Sturnidae	Resident wildbird	plain	RMC,Rajshahi	Rajshahi	2	24.371	88.5863	Negative	0	0
163	RI-165	February	Common myna	Sturnidae	Resident wildbird	plain	RMC,Rajshahi	Rajshahi	2	24.371	88.5863	Negative	0	0
164	RI-166	February	Rock pigeon	Columbidae	Resident wildbird	plain	RMC,Rajshahi	Rajshahi	2	24.371	88.5863	Negative	0	0
165	RI-167	February	Rock pigeon	Columbidae	Resident wildbird	plain	RMC,Rajshahi	Rajshahi	2	24.371	88.5863	Negative	0	0
166	RI-171	February	Crow	Corvidae	Resident wildbird	plain	RMC,Rajshahi	Rajshahi	2	24.371	88.5863	Negative	0	0
167	RI-172	February	Crow	Corvidae	Resident wildbird	plain	RMC,Rajshahi	Rajshahi	2	24.371	88.5863	Negative	0	0
168	RI-173	February	Crow	Corvidae	Resident wildbird	plain	RMC,Rajshahi	Rajshahi	2	24.371	88.5863	Negative	0	0
169	RI-174	February	Crow	Corvidae	Resident wildbird	plain	RMC,Rajshahi	Rajshahi	2	24.371	88.5863	Negative	0	0
170	RI-20	February	Crow	Corvidae	Resident wildbird	plain	RMC,Rajshahi	Rajshahi	2	24.371	88.5863	Negative	0	0
171	RI-21	February	Crow	Corvidae	Resident wildbird	plain	RMC,Rajshahi	Rajshahi	2	24.371	88.5863	Negative	0	0
172	RI-22	February	Crow	Corvidae	Resident wildbird	plain	RMC,Rajshahi	Rajshahi	2	24.371	88.5863	Negative	0	0
173	RI-46	February	Crow	Corvidae	Resident wildbird	plain	RMC,Rajshahi	Rajshahi	2	24.371	88.5863	Negative	0	0
174	RI-47	February	Crow	Corvidae	Resident wildbird	plain	RMC,Rajshahi	Rajshahi	2	24.371	88.5863	Negative	0	0
175	RI-48	February	Crow	Corvidae	Resident wildbird	plain	RMC,Rajshahi	Rajshahi	2	24.371	88.5863	Negative	0	0
176	RI-84	February	Crow	Corvidae	Resident wildbird	plain	RMC,Rajshahi	Rajshahi	2	24.371	88.5863	Negative	0	0
177	RI-85	February	Crow	Corvidae	Resident wildbird	plain	RMC,Rajshahi	Rajshahi	2	24.371	88.5863	Negative	0	0
178	RI-86	February	Crow	Corvidae	Resident wildbird	plain	RMC,Rajshahi	Rajshahi	2	24.371	88.5863	Negative	0	0
179	RI-87	February	Crow	Corvidae	Resident wildbird	plain	RMC,Rajshahi	Rajshahi	2	24.371	88.5863	Negative	0	0
180	RI-89	February	Crow	Corvidae	Resident wildbird	plain	RMC,Rajshahi	Rajshahi	2	24.371	88.5863	Negative	0	0
181	RI-90	February	Bran owl	Tytonidae	Resident wildbird	plain	RMC,Rajshahi	Rajshahi	2	24.371	88.5863	Negative	0	0
182	RI-93	February	Crow	Corvidae	Resident wildbird	plain	RMC,Rajshahi	Rajshahi	2	24.371	88.5863	Negative	0	0
183	RI-94	February	Crow	Corvidae	Resident wildbird	plain	RMC,Rajshahi	Rajshahi	2	24.371	88.5863	Negative	0	0
184	RI-97	February	Crow	Corvidae	Resident wildbird	plain	RMC,Rajshahi	Rajshahi	2	24.371	88.5863	Negative	0	0
